# Supplementary material for: Epidemiological Surveillance Reveals the Rise and Establishment of the Omicron SARS-CoV-2 Variant in Brazil
Source: MDPI journal article supplement (doi:10.3390/v15041017), 2023-04-20
Supplement: s1 [file s1]

## SUPPLEMENTAL TABLE

### **Data Availability**

GISAID Identifier: EPI\_SET\_221201my

doi: [10.55876/gis8.221201my](https://doi.org/10.55876/gis8.221201my)

All genome sequences and associated metadata in this dataset are published in GISAID's EpiCoV database. To view the contributors of each individual sequence with details such as accession number, Virus name, Collection date, Originating Lab and Submitting Lab and the list of Authors, visit [10.55876/gis8.221201my](https://gisaid.org/221201my)

### **Data Snapshot**

- EPI\_SET\_221201my is composed of 1,531 individual genome sequences.
- The collection dates range from 2021-11-29 to 2022-11-22;
- Data were collected in 147 countries and territories;
- All sequences in this dataset are compared relative to hCoV-19/Wuhan/WIV04/2019 (WIV04), the official reference sequence employed by GISAID (EPI\_ISL\_402124). Learn more at <https://gisaid.org/WIV04>.
