# Supplementary material for: Epidemiological Surveillance Reveals the Rise and Establishment of the Omicron SARS-CoV-2 Variant in Brazil
Source: MDPI journal article supplement (doi:10.3390/v15041017), 2023-04-20
Supplement: s1 [file s1]

Table S3: Periods dominated by different VOCs for each capital. The lineages showed a frequency above 90% between the initial and final dates. Intermediate frequency periods were excluded from the dataset.

| Capital        | VOC Delta                   |                  | VOC Omicron                 |                  |
|----------------|-----------------------------|------------------|-----------------------------|------------------|
|                | Date (epidemiological week) |                  | Date (epidemiological week) |                  |
|                | Start                       | End              | Start                       | End              |
| Belém          | 29-Ago-2021 (35)            | 19-Dec-2021 (51) | 09-Jan-2022 (02)            | 27-Feb-2022 (09) |
| Belo Horizonte | 29-Ago-2021 (35)            | 05-Dec-2021 (49) | 26-Dec-2021 (52)            | 27-Feb-2022 (09) |
| Boa Vista      | 12-Sep-2021 (37)            | 12-Dec-2021 (50) | 02-Jan-2022 (01)            | 06-Feb-2022 (06) |
| Brasília       | 29-Ago-2021 (35)            | 12-Dec-2021 (50) | 02-Jan-2022 (01)            | 20-Feb-2022 (08) |
| Fortaleza      | 29-Ago-2021 (35)            | 28-Nov-2021 (48) | 02-Jan-2022 (01)            | 27-Feb-2022 (09) |
| Goiânia        | 29-Ago-2021 (35)            | 28-Nov-2021 (48) | 26-Dec-2021 (52)            | 27-Feb-2022 (09) |
| Macapá         | 10-Oct-2021 (41)            | 19-Dec-2021 (51) | 09-Jan-2022 (02)            | 20-Feb-2022 (08) |
| Manaus         | 29-Ago-2021 (35)            | 28-Nov-2021 (48) | 02-Jan-2022 (01)            | 13-Feb-2022 (07) |
| Palmas         | 29-Ago-2021 (35)            | 19-Dec-2021 (51) | 09-Jan-2022 (02)            | 27-Feb-2022 (09) |
| Porto Velho    | 29-Ago-2021 (35)            | 12-Dec-2021 (50) | 02-Jan-2022 (01)            | 27-Feb-2022 (09) |
| Rio de Janeiro | 29-Ago-2021 (35)            | 21-Nov-2021 (47) | 19-Dec-2021 (51)            | 20-Feb-2022 (08) |
| São Paulo      | 29-Ago-2021 (35)            | 28-Nov-2021 (48) | 12-Dec-2021 (50)            | 27-Feb-2022 (09) |
