# Supplementary material for: Epidemiological Surveillance Reveals the Rise and Establishment of the Omicron SARS-CoV-2 Variant in Brazil
Source: MDPI journal article supplement (doi:10.3390/v15041017), 2023-04-20
Supplement: s1 [file s1]

Table S5: Variant effect on Ct value for each capital and at the national level using a linear regression model ( $\beta$ ). Two distinct viral targets (N and ORF1ab) and an internal process control (MS2) were analyzed. Positive  $\beta$  values indicate an increase in the Ct score in the period dominated by the Omicron VOC.

| Capital        | Number of Samples | N gene       |               |                   | ORF1ab gene  |               |                   | MS2 control  |               |                  |
|----------------|-------------------|--------------|---------------|-------------------|--------------|---------------|-------------------|--------------|---------------|------------------|
|                |                   | $\beta$      | 95% CI        | p-value           | $\beta$      | 95% CI        | p-value           | $\beta$      | 95% CI        | p-value          |
| Belém          | 2861              | 0.323        | ±0.757        | 0.403             | 0.468        | ±0.764        | 0.230             | 1.747        | ±1.506        | 6.47e-16*        |
| Belo Horizonte | 46266             | 1.077        | ±0.161        | <2e-16*           | 1.172        | ±0.160        | <2e-16*           | 0.123        | ±0.085        | 0.004*           |
| Boa Vista      | 444               | 1.080        | ±2.584        | 0.413             | 1.021        | ±2.638        | 0.448             | 1.238        | ±1.332        | 0.069            |
| Brasília       | 2976              | 0.448        | ±0.461        | 0.057             | 0.882        | ±0.454        | 0.00014*          | 0.621        | ±0.206        | 3.78e-09*        |
| Fortaleza      | 337               | -2.311       | ±2.985        | 0.130             | -2.545       | ±3.006        | 0.098             | -0.680       | ±1.258        | 0.290            |
| Goiânia        | 3093              | 1.612        | ±0.702        | 6.98e-06*         | 1.756        | ±0.702        | 1.02e-06*         | -0.480       | ±0.307        | 0.002*           |
| Macapá         | 1027              | 2.108        | ±2.027        | 0.0418*           | 2.151        | ±2.057        | 0.0407*           | 0.008        | ±1.023        | 0.987            |
| Manaus         | 565               | -0.297       | ±2.207        | 0.792             | -0.272       | ±2.246        | 0.813             | 2.129        | ±1.129        | 0.0002*          |
| Palmas         | 1267              | 2.087        | ±0.767        | 1.15e-07*         | 2.148        | ±0.777        | 7.3e-08 *         | 1.333        | ±0.489        | 1.1e-07*         |
| Porto Velho    | 2895              | 0.736        | ±0.784        | 0.066             | 0.886        | ±0.791        | 0.0281*           | 0.584        | ±0.421        | 0.007*           |
| Rio de Janeiro | 6383              | 1.382        | ±0.380        | 1.19e-12*         | 1.663        | ±0.383        | <2e-16*           | -0.178       | ±0.189        | 0.066            |
| São Paulo      | 4771              | 3.318        | ±0.458        | <2e-16*           | 3.645        | ±0.462        | <2e-16*           | 0.495        | ±0.222        | 1.23e-05*        |
| <b>Brazil</b>  | <b>72885</b>      | <b>1.114</b> | <b>±0.125</b> | <b>&lt;2e-16*</b> | <b>1.304</b> | <b>±0.124</b> | <b>&lt;2e-16*</b> | <b>0.267</b> | <b>±0.064</b> | <b>5.98e-16*</b> |

\*Statistically significant values ( $\alpha = 0.05$ ).
